# Supplementary material
Source: publisher figshare collection journal article supplement (https://aacr.figshare.com/articles/dataset/_/22370018)
Supplement: Supplementary file 1 [file 39815096]

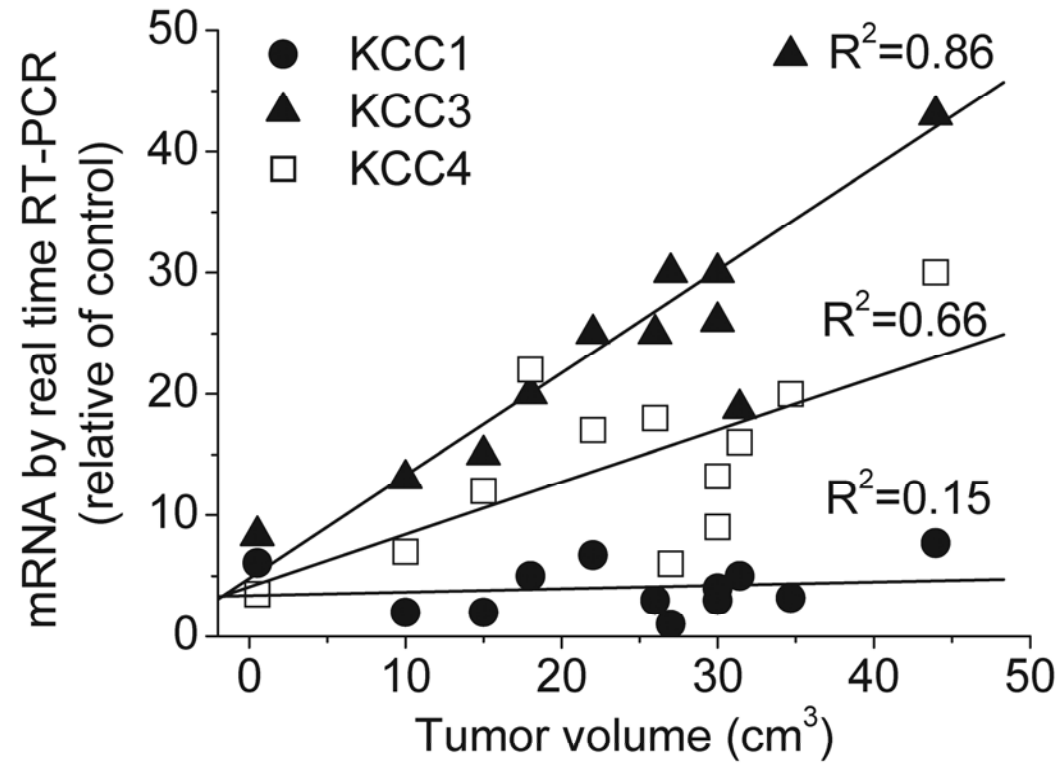

**Supplementary Figure 1.** The relationship between mRNA expression levels of KCC isoforms and tumor size in the surgical specimens of cervical carcinoma (n=12).
